# Supplementary material for: Artificial Neural Networks-Based Prediction of Hardness of Low-Alloy Steels Using Specific Jominy Distance
Source: MDPI journal article supplement (doi:10.3390/met11050714), 2021-04-27
Supplement: s1 [file s1]

**Table S1.** Data used for development and testing of artificial neural networks

| <b>Data No.</b> | <b>Steel designation</b> | <b>C wt. %</b> | <b>Si wt. %</b> | <b>Mn wt. %</b> | <b>Cr wt. %</b> | <b>Mo wt. %</b> | <b>Ni wt. %</b> | <b><math>E_d</math> mm</b> | <b><math>T_a</math> °C</b> | <b><math>t_a</math> min</b> | <b><math>t_{500}</math> s</b> | <b><math>HV_{tot}</math></b> |
|-----------------|--------------------------|----------------|-----------------|-----------------|-----------------|-----------------|-----------------|----------------------------|----------------------------|-----------------------------|-------------------------------|------------------------------|
| 1               | Ck15                     | 0.15           | 0.22            | 0.41            | 0.06            | 0.00            | 0.06            | 2.15                       | 900                        | 15                          | 0.71                          | 370.00                       |
| 2               | Ck15                     | 0.15           | 0.22            | 0.41            | 0.06            | 0.00            | 0.06            | 2.15                       | 900                        | 15                          | 1.53                          | 260.00                       |
| 3               | Ck15                     | 0.15           | 0.22            | 0.41            | 0.06            | 0.00            | 0.06            | 2.15                       | 900                        | 15                          | 2.56                          | 235.00                       |
| 4               | Ck15                     | 0.15           | 0.22            | 0.41            | 0.06            | 0.00            | 0.06            | 2.15                       | 900                        | 15                          | 3.86                          | 220.00                       |
| 5               | Ck15                     | 0.15           | 0.22            | 0.41            | 0.06            | 0.00            | 0.06            | 2.15                       | 900                        | 15                          | 6.13                          | 200.00                       |
| 6               | Ck15                     | 0.15           | 0.22            | 0.41            | 0.06            | 0.00            | 0.06            | 2.15                       | 900                        | 15                          | 18.05                         | 170.00                       |
| 7               | Ck15                     | 0.15           | 0.22            | 0.41            | 0.06            | 0.00            | 0.06            | 2.15                       | 900                        | 15                          | 58.93                         | 155.00                       |
| 8               | Ck15                     | 0.15           | 0.22            | 0.41            | 0.06            | 0.00            | 0.06            | 2.15                       | 900                        | 15                          | 356.68                        | 125.00                       |
| 9               | Ck15                     | 0.15           | 0.22            | 0.41            | 0.06            | 0.00            | 0.06            | 2.15                       | 900                        | 15                          | 2,392.82                      | 120.00                       |
| 10              | Ck15                     | 0.15           | 0.22            | 0.41            | 0.06            | 0.00            | 0.06            | 2.15                       | 900                        | 15                          | 92,288.47                     | 100.00                       |
| 11              | Ck15*                    | 0.30           | 0.29            | 0.39            | 0.12            | 0.00            | 0.00            | 2.78                       | 930                        | 30                          | 0.71                          | 550.00                       |
| 12              | Ck15*                    | 0.30           | 0.29            | 0.39            | 0.12            | 0.00            | 0.00            | 2.78                       | 930                        | 30                          | 1.01                          | 545.00                       |
| 13              | Ck15*                    | 0.30           | 0.29            | 0.39            | 0.12            | 0.00            | 0.00            | 2.78                       | 930                        | 30                          | 1.98                          | 415.00                       |
| 14              | Ck15*                    | 0.30           | 0.29            | 0.39            | 0.12            | 0.00            | 0.00            | 2.78                       | 930                        | 30                          | 4.06                          | 295.00                       |
| 15              | Ck15*                    | 0.30           | 0.29            | 0.39            | 0.12            | 0.00            | 0.00            | 2.78                       | 930                        | 30                          | 6.45                          | 255.00                       |
| 16              | Ck15*                    | 0.30           | 0.29            | 0.39            | 0.12            | 0.00            | 0.00            | 2.78                       | 930                        | 30                          | 13.26                         | 225.00                       |
| 17              | Ck15*                    | 0.30           | 0.29            | 0.39            | 0.12            | 0.00            | 0.00            | 2.78                       | 930                        | 30                          | 24.58                         | 210.00                       |
| 18              | Ck15*                    | 0.30           | 0.29            | 0.39            | 0.12            | 0.00            | 0.00            | 2.78                       | 930                        | 30                          | 55.97                         | 195.00                       |
| 19              | Ck15*                    | 0.30           | 0.29            | 0.39            | 0.12            | 0.00            | 0.00            | 2.78                       | 930                        | 30                          | 261.96                        | 185.00                       |
| 20              | Ck15*                    | 0.30           | 0.29            | 0.39            | 0.12            | 0.00            | 0.00            | 2.78                       | 930                        | 30                          | 1,358.80                      | 175.00                       |
| 21              | Ck15*                    | 0.30           | 0.29            | 0.39            | 0.12            | 0.00            | 0.00            | 2.78                       | 930                        | 30                          | 79,090.32                     | 150.00                       |
| 22              | 16MnCr5                  | 0.16           | 0.22            | 1.12            | 0.99            | 0.02            | 0.12            | 11.10                      | 870                        | 10                          | 0.64                          | 423.00                       |
| 23              | 16MnCr5                  | 0.16           | 0.22            | 1.12            | 0.99            | 0.02            | 0.12            | 11.10                      | 870                        | 10                          | 3.47                          | 412.00                       |
| 24              | 16MnCr5                  | 0.16           | 0.22            | 1.12            | 0.99            | 0.02            | 0.12            | 11.10                      | 870                        | 10                          | 19.91                         | 305.00                       |
| 25              | 16MnCr5                  | 0.16           | 0.22            | 1.12            | 0.99            | 0.02            | 0.12            | 11.10                      | 870                        | 10                          | 52.87                         | 268.00                       |
| 26              | 16MnCr5                  | 0.16           | 0.22            | 1.12            | 0.99            | 0.02            | 0.12            | 11.10                      | 870                        | 10                          | 88.40                         | 260.00                       |
| 27              | 16MnCr5                  | 0.16           | 0.22            | 1.12            | 0.99            | 0.02            | 0.12            | 11.10                      | 870                        | 10                          | 201.17                        | 229.00                       |
| 28              | 16MnCr5                  | 0.16           | 0.22            | 1.12            | 0.99            | 0.02            | 0.12            | 11.10                      | 870                        | 10                          | 273.84                        | 207.00                       |
| 29              | 16MnCr5                  | 0.16           | 0.22            | 1.12            | 0.99            | 0.02            | 0.12            | 11.10                      | 870                        | 10                          | 457.84                        | 188.00                       |
| 30              | 16MnCr5                  | 0.16           | 0.22            | 1.12            | 0.99            | 0.02            | 0.12            | 11.10                      | 870                        | 10                          | 592.00                        | 182.00                       |
| 31              | 16MnCr5                  | 0.16           | 0.22            | 1.12            | 0.99            | 0.02            | 0.12            | 11.10                      | 870                        | 10                          | 1,418.36                      | 181.00                       |
| 32              | 16MnCr5                  | 0.16           | 0.22            | 1.12            | 0.99            | 0.02            | 0.12            | 11.10                      | 870                        | 10                          | 2,371.37                      | 165.00                       |
| 33              | 16MnCr5                  | 0.16           | 0.22            | 1.12            | 0.99            | 0.02            | 0.12            | 8.33                       | 1050                       | 10                          | 0.60                          | 425.00                       |
| 34              | 16MnCr5                  | 0.16           | 0.22            | 1.12            | 0.99            | 0.02            | 0.12            | 8.33                       | 1050                       | 10                          | 4.05                          | 422.00                       |
| 35              | 16MnCr5                  | 0.16           | 0.22            | 1.12            | 0.99            | 0.02            | 0.12            | 8.33                       | 1050                       | 10                          | 18.91                         | 340.00                       |
| 36              | 16MnCr5                  | 0.16           | 0.22            | 1.12            | 0.99            | 0.02            | 0.12            | 8.33                       | 1050                       | 10                          | 58.59                         | 290.00                       |
| 37              | 16MnCr5                  | 0.16           | 0.22            | 1.12            | 0.99            | 0.02            | 0.12            | 8.33                       | 1050                       | 10                          | 88.40                         | 283.00                       |
| 38              | 16MnCr5                  | 0.16           | 0.22            | 1.12            | 0.99            | 0.02            | 0.12            | 8.33                       | 1050                       | 10                          | 155.58                        | 276.00                       |
| 39              | 16MnCr5                  | 0.16           | 0.22            | 1.12            | 0.99            | 0.02            | 0.12            | 8.33                       | 1050                       | 10                          | 247.09                        | 263.00                       |
| 40              | 16MnCr5                  | 0.16           | 0.22            | 1.12            | 0.99            | 0.02            | 0.12            | 8.33                       | 1050                       | 10                          | 354.08                        | 250.00                       |
| 41              | 16MnCr5                  | 0.16           | 0.22            | 1.12            | 0.99            | 0.02            | 0.12            | 8.33                       | 1050                       | 10                          | 848.34                        | 206.00                       |
| 42              | 16MnCr5                  | 0.16           | 0.22            | 1.12            | 0.99            | 0.02            | 0.12            | 8.33                       | 1050                       | 10                          | 1,279.80                      | 195.00                       |
| 43              | 16MnCr5                  | 0.16           | 0.22            | 1.12            | 0.99            | 0.02            | 0.12            | 8.33                       | 1050                       | 10                          | 6,978.31                      | 150.00                       |
| 44              | 15CrNi6                  | 0.13           | 0.31            | 0.51            | 1.50            | 0.06            | 1.55            | 25.00                      | 870                        | 10                          | 0.71                          | 417.00                       |
| 45              | 15CrNi6                  | 0.13           | 0.31            | 0.51            | 1.50            | 0.06            | 1.55            | 25.00                      | 870                        | 10                          | 2.74                          | 400.00                       |
| 46              | 15CrNi6                  | 0.13           | 0.31            | 0.51            | 1.50            | 0.06            | 1.55            | 25.00                      | 870                        | 10                          | 12.30                         | 396.00                       |
| 47              | 15CrNi6                  | 0.13           | 0.31            | 0.51            | 1.50            | 0.06            | 1.55            | 25.00                      | 870                        | 10                          | 47.22                         | 314.00                       |
| 48              | 15CrNi6                  | 0.13           | 0.31            | 0.51            | 1.50            | 0.06            | 1.55            | 25.00                      | 870                        | 10                          | 79.23                         | 304.00                       |
| 49              | 15CrNi6                  | 0.13           | 0.31            | 0.51            | 1.50            | 0.06            | 1.55            | 25.00                      | 870                        | 10                          | 132.92                        | 287.00                       |
| 50              | 15CrNi6                  | 0.13           | 0.31            | 0.51            | 1.50            | 0.06            | 1.55            | 25.00                      | 870                        | 10                          | 201.08                        | 268.00                       |
| 51              | 15CrNi6                  | 0.13           | 0.31            | 0.51            | 1.50            | 0.06            | 1.55            | 25.00                      | 870                        | 10                          | 304.19                        | 251.00                       |

|     |          |      |      |      |      |      |      |       |      |    |            |        |
|-----|----------|------|------|------|------|------|------|-------|------|----|------------|--------|
| 52  | 15CrNi6  | 0.13 | 0.31 | 0.51 | 1.50 | 0.06 | 1.55 | 25.00 | 870  | 10 | 1,053.11   | 224.00 |
| 53  | 15CrNi6  | 0.13 | 0.31 | 0.51 | 1.50 | 0.06 | 1.55 | 25.00 | 870  | 10 | 1,677.72   | 192.00 |
| 54  | 15CrNi6  | 0.13 | 0.31 | 0.51 | 1.50 | 0.06 | 1.55 | 25.00 | 870  | 10 | 7,143.85   | 167.00 |
| 55  | 15CrNi6  | 0.13 | 0.31 | 0.51 | 1.50 | 0.06 | 1.55 | 25.00 | 870  | 10 | 41,493.26  | 152.00 |
| 56  | 15CrNi6  | 0.13 | 0.31 | 0.51 | 1.50 | 0.06 | 1.55 | 25.00 | 870  | 10 | 85,621.78  | 151.00 |
| 57  | 15CrNi6  | 0.13 | 0.31 | 0.51 | 1.50 | 0.06 | 1.55 | 25.56 | 1050 | 10 | 1.21       | 413.00 |
| 58  | 15CrNi6  | 0.13 | 0.31 | 0.51 | 1.50 | 0.06 | 1.55 | 25.56 | 1050 | 10 | 3.08       | 406.00 |
| 59  | 15CrNi6  | 0.13 | 0.31 | 0.51 | 1.50 | 0.06 | 1.55 | 25.56 | 1050 | 10 | 13.18      | 395.00 |
| 60  | 15CrNi6  | 0.13 | 0.31 | 0.51 | 1.50 | 0.06 | 1.55 | 25.56 | 1050 | 10 | 50.86      | 329.00 |
| 61  | 15CrNi6  | 0.13 | 0.31 | 0.51 | 1.50 | 0.06 | 1.55 | 25.56 | 1050 | 10 | 90.04      | 313.00 |
| 62  | 15CrNi6  | 0.13 | 0.31 | 0.51 | 1.50 | 0.06 | 1.55 | 25.56 | 1050 | 10 | 159.41     | 294.00 |
| 63  | 15CrNi6  | 0.13 | 0.31 | 0.51 | 1.50 | 0.06 | 1.55 | 25.56 | 1050 | 10 | 217.69     | 289.00 |
| 64  | 15CrNi6  | 0.13 | 0.31 | 0.51 | 1.50 | 0.06 | 1.55 | 25.56 | 1050 | 10 | 329.81     | 285.00 |
| 65  | 15CrNi6  | 0.13 | 0.31 | 0.51 | 1.50 | 0.06 | 1.55 | 25.56 | 1050 | 10 | 1,272.47   | 263.00 |
| 66  | 15CrNi6  | 0.13 | 0.31 | 0.51 | 1.50 | 0.06 | 1.55 | 25.56 | 1050 | 10 | 1,566.24   | 245.00 |
| 67  | 15CrNi6  | 0.13 | 0.31 | 0.51 | 1.50 | 0.06 | 1.55 | 25.56 | 1050 | 10 | 7,061.47   | 169.00 |
| 68  | 15CrNi6  | 0.13 | 0.31 | 0.51 | 1.50 | 0.06 | 1.55 | 25.56 | 1050 | 10 | 41,275.93  | 163.00 |
| 69  | 15CrNi6  | 0.13 | 0.31 | 0.51 | 1.50 | 0.06 | 1.55 | 25.56 | 1050 | 10 | 81,074.80  | 147.00 |
| 70  | 20MoCr4* | 0.28 | 0.30 | 0.66 | 0.56 | 0.44 | 0.15 | 9.72  | 830  | 15 | 0.91       | 560.00 |
| 71  | 20MoCr4* | 0.28 | 0.30 | 0.66 | 0.56 | 0.44 | 0.15 | 9.72  | 830  | 15 | 4.71       | 540.00 |
| 72  | 20MoCr4* | 0.28 | 0.30 | 0.66 | 0.56 | 0.44 | 0.15 | 9.72  | 830  | 15 | 19.82      | 435.00 |
| 73  | 20MoCr4* | 0.28 | 0.30 | 0.66 | 0.56 | 0.44 | 0.15 | 9.72  | 830  | 15 | 64.56      | 305.00 |
| 74  | 20MoCr4* | 0.28 | 0.30 | 0.66 | 0.56 | 0.44 | 0.15 | 9.72  | 830  | 15 | 221.43     | 280.00 |
| 75  | 20MoCr4* | 0.28 | 0.30 | 0.66 | 0.56 | 0.44 | 0.15 | 9.72  | 830  | 15 | 454.41     | 255.00 |
| 76  | 20MoCr4* | 0.28 | 0.30 | 0.66 | 0.56 | 0.44 | 0.15 | 9.72  | 830  | 15 | 1,145.19   | 230.00 |
| 77  | 20MoCr4* | 0.28 | 0.30 | 0.66 | 0.56 | 0.44 | 0.15 | 9.72  | 830  | 15 | 2,350.16   | 205.00 |
| 78  | 20MoCr4* | 0.28 | 0.30 | 0.66 | 0.56 | 0.44 | 0.15 | 9.72  | 830  | 15 | 6,909.22   | 185.00 |
| 79  | 20MoCr4* | 0.28 | 0.30 | 0.66 | 0.56 | 0.44 | 0.15 | 9.72  | 830  | 15 | 81,264.69  | 160.00 |
| 80  | 20MoCr4* | 0.28 | 0.30 | 0.66 | 0.56 | 0.44 | 0.15 | 10.41 | 930  | 30 | 0.57       | 560.00 |
| 81  | 20MoCr4* | 0.28 | 0.30 | 0.66 | 0.56 | 0.44 | 0.15 | 10.41 | 930  | 30 | 1.60       | 550.00 |
| 82  | 20MoCr4* | 0.28 | 0.30 | 0.66 | 0.56 | 0.44 | 0.15 | 10.41 | 930  | 30 | 3.64       | 545.00 |
| 83  | 20MoCr4* | 0.28 | 0.30 | 0.66 | 0.56 | 0.44 | 0.15 | 10.41 | 930  | 30 | 7.10       | 530.00 |
| 84  | 20MoCr4* | 0.28 | 0.30 | 0.66 | 0.56 | 0.44 | 0.15 | 10.41 | 930  | 30 | 25.62      | 420.00 |
| 85  | 20MoCr4* | 0.28 | 0.30 | 0.66 | 0.56 | 0.44 | 0.15 | 10.41 | 930  | 30 | 79.29      | 305.00 |
| 86  | 20MoCr4* | 0.28 | 0.30 | 0.66 | 0.56 | 0.44 | 0.15 | 10.41 | 930  | 30 | 245.38     | 280.00 |
| 87  | 20MoCr4* | 0.28 | 0.30 | 0.66 | 0.56 | 0.44 | 0.15 | 10.41 | 930  | 30 | 410.06     | 265.00 |
| 88  | 20MoCr4* | 0.28 | 0.30 | 0.66 | 0.56 | 0.44 | 0.15 | 10.41 | 930  | 30 | 1,406.31   | 230.00 |
| 89  | 20MoCr4* | 0.28 | 0.30 | 0.66 | 0.56 | 0.44 | 0.15 | 10.41 | 930  | 30 | 3,198.21   | 205.00 |
| 90  | 20MoCr4* | 0.28 | 0.30 | 0.66 | 0.56 | 0.44 | 0.15 | 10.41 | 930  | 30 | 9,897.82   | 190.00 |
| 91  | 20MoCr4* | 0.28 | 0.30 | 0.66 | 0.56 | 0.44 | 0.15 | 10.41 | 930  | 30 | 18,329.81  | 175.00 |
| 92  | 20MoCr4* | 0.28 | 0.30 | 0.66 | 0.56 | 0.44 | 0.15 | 10.41 | 930  | 30 | 116,415.95 | 160.00 |
| 93  | 20MoCr4* | 0.57 | 0.30 | 0.66 | 0.56 | 0.44 | 0.15 | 29.16 | 830  | 15 | 0.40       | 875.00 |
| 94  | 20MoCr4* | 0.57 | 0.30 | 0.66 | 0.56 | 0.44 | 0.15 | 29.16 | 830  | 15 | 3.12       | 820.00 |
| 95  | 20MoCr4* | 0.57 | 0.30 | 0.66 | 0.56 | 0.44 | 0.15 | 29.16 | 830  | 15 | 16.99      | 775.00 |
| 96  | 20MoCr4* | 0.57 | 0.30 | 0.66 | 0.56 | 0.44 | 0.15 | 29.16 | 830  | 15 | 49.94      | 750.00 |
| 97  | 20MoCr4* | 0.57 | 0.30 | 0.66 | 0.56 | 0.44 | 0.15 | 29.16 | 830  | 15 | 139.48     | 715.00 |
| 98  | 20MoCr4* | 0.57 | 0.30 | 0.66 | 0.56 | 0.44 | 0.15 | 29.16 | 830  | 15 | 721.38     | 360.00 |
| 99  | 20MoCr4* | 0.57 | 0.30 | 0.66 | 0.56 | 0.44 | 0.15 | 29.16 | 830  | 15 | 1,205.53   | 350.00 |
| 100 | 20MoCr4* | 0.57 | 0.30 | 0.66 | 0.56 | 0.44 | 0.15 | 29.16 | 830  | 15 | 2,473.99   | 335.00 |
| 101 | 20MoCr4* | 0.57 | 0.30 | 0.66 | 0.56 | 0.44 | 0.15 | 29.16 | 830  | 15 | 6,909.22   | 290.00 |
| 102 | 20MoCr4* | 0.57 | 0.30 | 0.66 | 0.56 | 0.44 | 0.15 | 29.16 | 830  | 15 | 12,795.21  | 250.00 |
| 103 | 20MoCr4* | 0.57 | 0.30 | 0.66 | 0.56 | 0.44 | 0.15 | 29.15 | 830  | 15 | 27,642.04  | 235.00 |
| 104 | 20MoCr4* | 0.57 | 0.30 | 0.66 | 0.56 | 0.44 | 0.15 | 29.16 | 830  | 15 | 85,546.73  | 220.00 |
| 105 | 20MoCr4* | 0.57 | 0.30 | 0.66 | 0.56 | 0.44 | 0.15 | 27.08 | 930  | 30 | 0.86       | 855.00 |
| 106 | 20MoCr4* | 0.57 | 0.30 | 0.66 | 0.56 | 0.44 | 0.15 | 27.08 | 930  | 30 | 16.14      | 780.00 |

|     |            |      |      |      |      |      |      |       |      |    |            |        |
|-----|------------|------|------|------|------|------|------|-------|------|----|------------|--------|
| 107 | 20MoCr4*   | 0.57 | 0.30 | 0.66 | 0.56 | 0.44 | 0.15 | 27.08 | 930  | 30 | 52.58      | 755.00 |
| 108 | 20MoCr4*   | 0.57 | 0.30 | 0.66 | 0.56 | 0.44 | 0.15 | 27.08 | 930  | 30 | 146.83     | 720.00 |
| 109 | 20MoCr4*   | 0.57 | 0.30 | 0.66 | 0.56 | 0.44 | 0.15 | 27.08 | 930  | 30 | 807.65     | 365.00 |
| 110 | 20MoCr4*   | 0.57 | 0.30 | 0.66 | 0.56 | 0.44 | 0.15 | 27.08 | 930  | 30 | 1,406.31   | 355.00 |
| 111 | 20MoCr4*   | 0.57 | 0.30 | 0.66 | 0.56 | 0.44 | 0.15 | 27.08 | 930  | 30 | 2,741.59   | 345.00 |
| 112 | 20MoCr4*   | 0.57 | 0.30 | 0.66 | 0.56 | 0.44 | 0.15 | 27.08 | 930  | 30 | 8,484.67   | 310.00 |
| 113 | 20MoCr4*   | 0.57 | 0.30 | 0.66 | 0.56 | 0.44 | 0.15 | 27.08 | 930  | 30 | 30,631.84  | 255.00 |
| 114 | 20MoCr4*   | 0.57 | 0.30 | 0.66 | 0.56 | 0.44 | 0.15 | 27.08 | 930  | 30 | 105,053.24 | 230.00 |
| 115 | 25MoCr4    | 0.31 | 0.20 | 0.67 | 0.50 | 0.45 | 0.11 | 13.89 | 830  | 15 | 0.74       | 560.00 |
| 116 | 25MoCr4    | 0.31 | 0.20 | 0.67 | 0.50 | 0.45 | 0.11 | 13.89 | 830  | 15 | 3.13       | 540.00 |
| 117 | 25MoCr4    | 0.31 | 0.20 | 0.67 | 0.50 | 0.45 | 0.11 | 13.89 | 830  | 15 | 7.50       | 490.00 |
| 118 | 25MoCr4    | 0.31 | 0.20 | 0.67 | 0.50 | 0.45 | 0.11 | 13.89 | 830  | 15 | 23.23      | 325.00 |
| 119 | 25MoCr4    | 0.31 | 0.20 | 0.67 | 0.50 | 0.45 | 0.11 | 13.89 | 830  | 15 | 64.94      | 290.00 |
| 120 | 25MoCr4    | 0.31 | 0.20 | 0.67 | 0.50 | 0.45 | 0.11 | 13.89 | 830  | 15 | 211.78     | 260.00 |
| 121 | 25MoCr4    | 0.31 | 0.20 | 0.67 | 0.50 | 0.45 | 0.11 | 13.89 | 830  | 15 | 434.90     | 240.00 |
| 122 | 25MoCr4    | 0.31 | 0.20 | 0.67 | 0.50 | 0.45 | 0.11 | 13.89 | 830  | 15 | 1,215.69   | 215.00 |
| 123 | 25MoCr4    | 0.31 | 0.20 | 0.67 | 0.50 | 0.45 | 0.11 | 13.89 | 830  | 15 | 2,628.11   | 195.00 |
| 124 | 25MoCr4    | 0.31 | 0.20 | 0.67 | 0.50 | 0.45 | 0.11 | 13.89 | 830  | 15 | 6,978.31   | 180.00 |
| 125 | 25MoCr4    | 0.31 | 0.20 | 0.67 | 0.50 | 0.45 | 0.11 | 13.89 | 830  | 15 | 86,596.43  | 155.00 |
| 126 | 25MoCr4    | 0.31 | 0.20 | 0.67 | 0.50 | 0.45 | 0.11 | 19.44 | 930  | 30 | 0.66       | 560.00 |
| 127 | 25MoCr4    | 0.31 | 0.20 | 0.67 | 0.50 | 0.45 | 0.11 | 19.44 | 930  | 30 | 4.19       | 535.00 |
| 128 | 25MoCr4    | 0.31 | 0.20 | 0.67 | 0.50 | 0.45 | 0.11 | 19.44 | 930  | 30 | 9.50       | 465.00 |
| 129 | 25MoCr4    | 0.31 | 0.20 | 0.67 | 0.50 | 0.45 | 0.11 | 19.44 | 930  | 30 | 27.83      | 325.00 |
| 130 | 25MoCr4    | 0.31 | 0.20 | 0.67 | 0.50 | 0.45 | 0.11 | 19.44 | 930  | 30 | 77.43      | 290.00 |
| 131 | 25MoCr4    | 0.31 | 0.20 | 0.67 | 0.50 | 0.45 | 0.11 | 19.44 | 930  | 30 | 110.78     | 280.00 |
| 132 | 25MoCr4    | 0.31 | 0.20 | 0.67 | 0.50 | 0.45 | 0.11 | 19.44 | 930  | 30 | 238.66     | 260.00 |
| 133 | 25MoCr4    | 0.31 | 0.20 | 0.67 | 0.50 | 0.45 | 0.11 | 19.44 | 930  | 30 | 488.53     | 240.00 |
| 134 | 25MoCr4    | 0.31 | 0.20 | 0.67 | 0.50 | 0.45 | 0.11 | 19.44 | 930  | 30 | 1,359.36   | 215.00 |
| 135 | 25MoCr4    | 0.31 | 0.20 | 0.67 | 0.50 | 0.45 | 0.11 | 19.44 | 930  | 30 | 3,082.40   | 195.00 |
| 136 | 25MoCr4    | 0.31 | 0.20 | 0.67 | 0.50 | 0.45 | 0.11 | 19.44 | 930  | 30 | 18,478.50  | 175.00 |
| 137 | 25MoCr4    | 0.31 | 0.20 | 0.67 | 0.50 | 0.45 | 0.11 | 19.44 | 930  | 30 | 110,775.69 | 165.00 |
| 138 | 20NiMoCr6* | 0.28 | 0.15 | 0.62 | 0.47 | 0.48 | 1.58 | 36.11 | 930  | 30 | 0.60       | 570.00 |
| 139 | 20NiMoCr6* | 0.28 | 0.15 | 0.62 | 0.47 | 0.48 | 1.58 | 36.11 | 930  | 30 | 2.93       | 540.00 |
| 140 | 20NiMoCr6* | 0.28 | 0.15 | 0.62 | 0.47 | 0.48 | 1.58 | 36.11 | 930  | 30 | 23.87      | 515.00 |
| 141 | 20NiMoCr6* | 0.28 | 0.15 | 0.62 | 0.47 | 0.48 | 1.58 | 36.11 | 930  | 30 | 59.95      | 380.00 |
| 142 | 20NiMoCr6* | 0.28 | 0.15 | 0.62 | 0.47 | 0.48 | 1.58 | 36.11 | 930  | 30 | 251.19     | 305.00 |
| 143 | 20NiMoCr6* | 0.28 | 0.15 | 0.62 | 0.47 | 0.48 | 1.58 | 36.11 | 930  | 30 | 814.91     | 285.00 |
| 144 | 20NiMoCr6* | 0.28 | 0.15 | 0.62 | 0.47 | 0.48 | 1.58 | 36.11 | 930  | 30 | 3,082.40   | 265.00 |
| 145 | 20NiMoCr6* | 0.28 | 0.15 | 0.62 | 0.47 | 0.48 | 1.58 | 36.11 | 930  | 30 | 18,478.50  | 225.00 |
| 146 | 20NiMoCr6* | 0.28 | 0.15 | 0.62 | 0.47 | 0.48 | 1.58 | 36.11 | 930  | 30 | 48,852.74  | 215.00 |
| 147 | 20NiMoCr6* | 0.28 | 0.15 | 0.62 | 0.47 | 0.48 | 1.58 | 36.11 | 930  | 30 | 100,000.00 | 185.00 |
| 148 | Ck45       | 0.44 | 0.22 | 0.66 | 0.15 | 0.00 | 0.00 | 5     | 880  | 3  | 1.80       | 548.0  |
| 149 | Ck45       | 0.44 | 0.22 | 0.66 | 0.15 | 0.00 | 0.00 | 5     | 880  | 3  | 2.80       | 533.0  |
| 150 | Ck45       | 0.44 | 0.22 | 0.66 | 0.15 | 0.00 | 0.00 | 5     | 880  | 3  | 5.30       | 318.0  |
| 151 | Ck45       | 0.44 | 0.22 | 0.66 | 0.15 | 0.00 | 0.00 | 5     | 880  | 3  | 8.80       | 274.0  |
| 152 | Ck45       | 0.44 | 0.22 | 0.66 | 0.15 | 0.00 | 0.00 | 5     | 880  | 3  | 17.80      | 274.0  |
| 153 | Ck45       | 0.44 | 0.22 | 0.66 | 0.15 | 0.00 | 0.00 | 5     | 880  | 3  | 73.30      | 224.0  |
| 154 | Ck45       | 0.44 | 0.22 | 0.66 | 0.15 | 0.00 | 0.00 | 5     | 880  | 3  | 714.40     | 210.0  |
| 155 | Ck45       | 0.44 | 0.22 | 0.66 | 0.15 | 0.00 | 0.00 | 5     | 880  | 3  | 32,874.10  | 179.0  |
| 156 | Ck45       | 0.44 | 0.22 | 0.66 | 0.15 | 0.00 | 0.00 | 5     | 1050 | 3  | 2.20       | 701.0  |
| 157 | Ck45       | 0.44 | 0.22 | 0.66 | 0.15 | 0.00 | 0.00 | 5     | 1050 | 3  | 3.50       | 698.0  |
| 158 | Ck45       | 0.44 | 0.22 | 0.66 | 0.15 | 0.00 | 0.00 | 5     | 1050 | 3  | 5.00       | 673.0  |
| 159 | Ck45       | 0.44 | 0.22 | 0.66 | 0.15 | 0.00 | 0.00 | 5     | 1050 | 3  | 8.30       | 516.0  |
| 160 | Ck45       | 0.44 | 0.22 | 0.66 | 0.15 | 0.00 | 0.00 | 5     | 1050 | 3  | 14.00      | 363.0  |
| 161 | Ck45       | 0.44 | 0.22 | 0.66 | 0.15 | 0.00 | 0.00 | 5     | 1050 | 3  | 51.00      | 264.0  |

|     |         |      |      |      |      |      |      |    |      |   |           |       |
|-----|---------|------|------|------|------|------|------|----|------|---|-----------|-------|
| 162 | Ck45    | 0.44 | 0.22 | 0.66 | 0.15 | 0.00 | 0.00 | 5  | 1050 | 3 | 136.40    | 237.0 |
| 163 | Ck45    | 0.44 | 0.22 | 0.66 | 0.15 | 0.00 | 0.00 | 5  | 1050 | 3 | 925.30    | 217.0 |
| 164 | Ck45    | 0.44 | 0.22 | 0.66 | 0.15 | 0.00 | 0.00 | 5  | 1050 | 3 | 32,874.10 | 195.0 |
| 165 | 37MnSi5 | 0.38 | 1.05 | 1.14 | 0.23 | 0.00 | 0.00 | 9  | 860  | 7 | 2.90      | 735.0 |
| 166 | 37MnSi5 | 0.38 | 1.05 | 1.14 | 0.23 | 0.00 | 0.00 | 9  | 860  | 7 | 6.60      | 735.0 |
| 167 | 37MnSi5 | 0.38 | 1.05 | 1.14 | 0.23 | 0.00 | 0.00 | 9  | 860  | 7 | 13.60     | 473.0 |
| 168 | 37MnSi5 | 0.38 | 1.05 | 1.14 | 0.23 | 0.00 | 0.00 | 9  | 860  | 7 | 30.80     | 375.0 |
| 169 | 37MnSi5 | 0.38 | 1.05 | 1.14 | 0.23 | 0.00 | 0.00 | 9  | 860  | 7 | 51.40     | 267.0 |
| 170 | 37MnSi5 | 0.38 | 1.05 | 1.14 | 0.23 | 0.00 | 0.00 | 9  | 860  | 7 | 69.90     | 256.0 |
| 171 | 37MnSi5 | 0.38 | 1.05 | 1.14 | 0.23 | 0.00 | 0.00 | 9  | 860  | 7 | 135.90    | 241.0 |
| 172 | 37MnSi5 | 0.38 | 1.05 | 1.14 | 0.23 | 0.00 | 0.00 | 9  | 860  | 7 | 292.90    | 229.0 |
| 173 | 37MnSi5 | 0.38 | 1.05 | 1.14 | 0.23 | 0.00 | 0.00 | 9  | 860  | 7 | 1,107.80  | 223.0 |
| 174 | 37MnSi5 | 0.38 | 1.05 | 1.14 | 0.23 | 0.00 | 0.00 | 9  | 860  | 7 | 7,356.40  | 220.0 |
| 175 | 37MnSi5 | 0.38 | 1.05 | 1.14 | 0.23 | 0.00 | 0.00 | 15 | 1050 | 5 | 3.10      | 735.0 |
| 176 | 37MnSi5 | 0.38 | 1.05 | 1.14 | 0.23 | 0.00 | 0.00 | 15 | 1050 | 5 | 7.00      | 692.0 |
| 177 | 37MnSi5 | 0.38 | 1.05 | 1.14 | 0.23 | 0.00 | 0.00 | 15 | 1050 | 5 | 13.60     | 608.0 |
| 178 | 37MnSi5 | 0.38 | 1.05 | 1.14 | 0.23 | 0.00 | 0.00 | 15 | 1050 | 5 | 26.40     | 350.0 |
| 179 | 37MnSi5 | 0.38 | 1.05 | 1.14 | 0.23 | 0.00 | 0.00 | 15 | 1050 | 5 | 69.90     | 305.0 |
| 180 | 37MnSi5 | 0.38 | 1.05 | 1.14 | 0.23 | 0.00 | 0.00 | 15 | 1050 | 5 | 135.90    | 248.0 |
| 181 | 37MnSi5 | 0.38 | 1.05 | 1.14 | 0.23 | 0.00 | 0.00 | 15 | 1050 | 5 | 324.40    | 235.0 |
| 182 | 37MnSi5 | 0.38 | 1.05 | 1.14 | 0.23 | 0.00 | 0.00 | 15 | 1050 | 5 | 1,052.50  | 229.0 |
| 183 | 37MnSi5 | 0.38 | 1.05 | 1.14 | 0.23 | 0.00 | 0.00 | 15 | 1050 | 5 | 7,742.60  | 229.0 |
| 184 | 42MnV7  | 0.43 | 0.28 | 1.67 | 0.32 | 0.03 | 0.11 | 16 | 870  | 8 | 4.70      | 818.0 |
| 185 | 42MnV7  | 0.43 | 0.28 | 1.67 | 0.32 | 0.03 | 0.11 | 16 | 870  | 8 | 10.30     | 645.0 |
| 186 | 42MnV7  | 0.43 | 0.28 | 1.67 | 0.32 | 0.03 | 0.11 | 16 | 870  | 8 | 43.70     | 327.0 |
| 187 | 42MnV7  | 0.43 | 0.28 | 1.67 | 0.32 | 0.03 | 0.11 | 16 | 870  | 8 | 77.20     | 327.0 |
| 188 | 42MnV7  | 0.43 | 0.28 | 1.67 | 0.32 | 0.03 | 0.11 | 16 | 870  | 8 | 129.50    | 316.0 |
| 189 | 42MnV7  | 0.43 | 0.28 | 1.67 | 0.32 | 0.03 | 0.11 | 16 | 870  | 8 | 296.40    | 270.0 |
| 190 | 42MnV7  | 0.43 | 0.28 | 1.67 | 0.32 | 0.03 | 0.11 | 16 | 870  | 8 | 1,026.20  | 248.0 |
| 191 | 42MnV7  | 0.43 | 0.28 | 1.67 | 0.32 | 0.03 | 0.11 | 16 | 870  | 8 | 6,961.40  | 235.0 |
| 192 | 42MnV7  | 0.43 | 0.28 | 1.67 | 0.32 | 0.03 | 0.11 | 16 | 870  | 8 | 79,227.60 | 220.0 |
| 193 | 42MnV7  | 0.43 | 0.28 | 1.67 | 0.32 | 0.03 | 0.11 | 31 | 1050 | 8 | 8.80      | 790.0 |
| 194 | 42MnV7  | 0.43 | 0.28 | 1.67 | 0.32 | 0.03 | 0.11 | 31 | 1050 | 8 | 20.10     | 608.0 |
| 195 | 42MnV7  | 0.43 | 0.28 | 1.67 | 0.32 | 0.03 | 0.11 | 31 | 1050 | 8 | 39.40     | 608.0 |
| 196 | 42MnV7  | 0.43 | 0.28 | 1.67 | 0.32 | 0.03 | 0.11 | 31 | 1050 | 8 | 136.40    | 316.0 |
| 197 | 42MnV7  | 0.43 | 0.28 | 1.67 | 0.32 | 0.03 | 0.11 | 31 | 1050 | 8 | 328.70    | 327.0 |
| 198 | 42MnV7  | 0.43 | 0.28 | 1.67 | 0.32 | 0.03 | 0.11 | 31 | 1050 | 8 | 1,026.20  | 327.0 |
| 199 | 42MnV7  | 0.43 | 0.28 | 1.67 | 0.32 | 0.03 | 0.11 | 31 | 1050 | 8 | 6,277.00  | 263.0 |
| 200 | 42MnV7  | 0.43 | 0.28 | 1.67 | 0.32 | 0.03 | 0.11 | 31 | 1050 | 8 | 47,223.40 | 229.0 |
| 201 | 42MnV7  | 0.43 | 0.28 | 1.67 | 0.32 | 0.03 | 0.11 | 31 | 1050 | 8 | 79,227.60 | 240.0 |
| 202 | 34Cr4   | 0.35 | 0.23 | 0.65 | 1.11 | 0.05 | 0.23 | 17 | 850  | 8 | 6.80      | 669.0 |
| 203 | 34Cr4   | 0.35 | 0.23 | 0.65 | 1.11 | 0.05 | 0.23 | 17 | 850  | 8 | 12.60     | 575.0 |
| 204 | 34Cr4   | 0.35 | 0.23 | 0.65 | 1.11 | 0.05 | 0.23 | 17 | 850  | 8 | 23.50     | 473.0 |
| 205 | 34Cr4   | 0.35 | 0.23 | 0.65 | 1.11 | 0.05 | 0.23 | 17 | 850  | 8 | 48.50     | 363.0 |
| 206 | 34Cr4   | 0.35 | 0.23 | 0.65 | 1.11 | 0.05 | 0.23 | 17 | 850  | 8 | 77.20     | 327.0 |
| 207 | 34Cr4   | 0.35 | 0.23 | 0.65 | 1.11 | 0.05 | 0.23 | 17 | 850  | 8 | 136.40    | 279.0 |
| 208 | 34Cr4   | 0.35 | 0.23 | 0.65 | 1.11 | 0.05 | 0.23 | 17 | 850  | 8 | 228.80    | 241.0 |
| 209 | 34Cr4   | 0.35 | 0.23 | 0.65 | 1.11 | 0.05 | 0.23 | 17 | 850  | 8 | 312.20    | 241.0 |
| 210 | 34Cr4   | 0.35 | 0.23 | 0.65 | 1.11 | 0.05 | 0.23 | 17 | 850  | 8 | 678.40    | 240.0 |
| 211 | 34Cr4   | 0.35 | 0.23 | 0.65 | 1.11 | 0.05 | 0.23 | 17 | 850  | 8 | 6,610.40  | 210.0 |
| 212 | 34Cr4   | 0.35 | 0.23 | 0.65 | 1.11 | 0.05 | 0.23 | 17 | 850  | 8 | 83,435.00 | 180.0 |
| 213 | 34Cr4   | 0.35 | 0.23 | 0.65 | 1.11 | 0.05 | 0.23 | 17 | 1050 | 8 | 6.80      | 669.0 |
| 214 | 34Cr4   | 0.35 | 0.23 | 0.65 | 1.11 | 0.05 | 0.23 | 17 | 1050 | 8 | 10.80     | 575.0 |
| 215 | 34Cr4   | 0.35 | 0.23 | 0.65 | 1.11 | 0.05 | 0.23 | 17 | 1050 | 8 | 21.20     | 496.0 |
| 216 | 34Cr4   | 0.35 | 0.23 | 0.65 | 1.11 | 0.05 | 0.23 | 17 | 1050 | 8 | 77.20     | 305.0 |

|     |       |      |      |      |      |      |      |    |      |    |           |       |
|-----|-------|------|------|------|------|------|------|----|------|----|-----------|-------|
| 217 | 34Cr4 | 0.35 | 0.23 | 0.65 | 1.11 | 0.05 | 0.23 | 17 | 1050 | 8  | 217.30    | 241.0 |
| 218 | 34Cr4 | 0.35 | 0.23 | 0.65 | 1.11 | 0.05 | 0.23 | 17 | 1050 | 8  | 425.80    | 248.0 |
| 219 | 34Cr4 | 0.35 | 0.23 | 0.65 | 1.11 | 0.05 | 0.23 | 17 | 1050 | 8  | 611.70    | 248.0 |
| 220 | 34Cr4 | 0.35 | 0.23 | 0.65 | 1.11 | 0.05 | 0.23 | 17 | 1050 | 8  | 974.50    | 229.0 |
| 221 | 34Cr4 | 0.35 | 0.23 | 0.65 | 1.11 | 0.05 | 0.23 | 17 | 1050 | 8  | 6,961.40  | 220.0 |
| 222 | 34Cr4 | 0.35 | 0.23 | 0.65 | 1.11 | 0.05 | 0.23 | 17 | 1050 | 8  | 71,438.50 | 210.0 |
| 223 | 34Cr4 | 0.36 | 0.29 | 0.69 | 1.09 | 0.07 | 0.08 | 13 | 850  | 8  | 2.70      | 735.0 |
| 224 | 34Cr4 | 0.36 | 0.29 | 0.69 | 1.09 | 0.07 | 0.08 | 13 | 850  | 8  | 6.80      | 669.0 |
| 225 | 34Cr4 | 0.36 | 0.29 | 0.69 | 1.09 | 0.07 | 0.08 | 13 | 850  | 8  | 15.50     | 496.0 |
| 226 | 34Cr4 | 0.36 | 0.29 | 0.69 | 1.09 | 0.07 | 0.08 | 13 | 850  | 8  | 24.70     | 404.0 |
| 227 | 34Cr4 | 0.36 | 0.29 | 0.69 | 1.09 | 0.07 | 0.08 | 13 | 850  | 8  | 48.50     | 363.0 |
| 228 | 34Cr4 | 0.36 | 0.29 | 0.69 | 1.09 | 0.07 | 0.08 | 13 | 850  | 8  | 81.30     | 316.0 |
| 229 | 34Cr4 | 0.36 | 0.29 | 0.69 | 1.09 | 0.07 | 0.08 | 13 | 850  | 8  | 136.40    | 223.0 |
| 230 | 34Cr4 | 0.36 | 0.29 | 0.69 | 1.09 | 0.07 | 0.08 | 13 | 850  | 8  | 296.40    | 250.0 |
| 231 | 34Cr4 | 0.36 | 0.29 | 0.69 | 1.09 | 0.07 | 0.08 | 13 | 850  | 8  | 1,138.10  | 220.0 |
| 232 | 41Cr4 | 0.44 | 0.22 | 0.80 | 1.04 | 0.04 | 0.26 | 23 | 840  | 8  | 7.10      | 790.0 |
| 233 | 41Cr4 | 0.44 | 0.22 | 0.80 | 1.04 | 0.04 | 0.26 | 23 | 840  | 8  | 10.80     | 627.0 |
| 234 | 41Cr4 | 0.44 | 0.22 | 0.80 | 1.04 | 0.04 | 0.26 | 23 | 840  | 8  | 23.50     | 575.0 |
| 235 | 41Cr4 | 0.44 | 0.22 | 0.80 | 1.04 | 0.04 | 0.26 | 23 | 840  | 8  | 41.50     | 437.0 |
| 236 | 41Cr4 | 0.44 | 0.22 | 0.80 | 1.04 | 0.04 | 0.26 | 23 | 840  | 8  | 62.80     | 375.0 |
| 237 | 41Cr4 | 0.44 | 0.22 | 0.80 | 1.04 | 0.04 | 0.26 | 23 | 840  | 8  | 129.50    | 327.0 |
| 238 | 41Cr4 | 0.44 | 0.22 | 0.80 | 1.04 | 0.04 | 0.26 | 23 | 840  | 8  | 206.40    | 350.0 |
| 239 | 41Cr4 | 0.44 | 0.22 | 0.80 | 1.04 | 0.04 | 0.26 | 23 | 840  | 8  | 296.40    | 267.0 |
| 240 | 41Cr4 | 0.44 | 0.22 | 0.80 | 1.04 | 0.04 | 0.26 | 23 | 840  | 8  | 644.20    | 223.0 |
| 241 | 41Cr4 | 0.44 | 0.22 | 0.80 | 1.04 | 0.04 | 0.26 | 23 | 840  | 8  | 6,277.00  | 230.0 |
| 242 | 41Cr4 | 0.44 | 0.22 | 0.80 | 1.04 | 0.04 | 0.26 | 23 | 840  | 8  | 80,051.70 | 180.0 |
| 243 | 41Cr4 | 0.44 | 0.22 | 0.80 | 1.04 | 0.04 | 0.26 | 24 | 1050 | 8  | 5.70      | 790.0 |
| 244 | 41Cr4 | 0.44 | 0.22 | 0.80 | 1.04 | 0.04 | 0.26 | 24 | 1050 | 8  | 11.40     | 627.0 |
| 245 | 41Cr4 | 0.44 | 0.22 | 0.80 | 1.04 | 0.04 | 0.26 | 24 | 1050 | 8  | 41.50     | 508.0 |
| 246 | 41Cr4 | 0.44 | 0.22 | 0.80 | 1.04 | 0.04 | 0.26 | 24 | 1050 | 8  | 136.40    | 327.0 |
| 247 | 41Cr4 | 0.44 | 0.22 | 0.80 | 1.04 | 0.04 | 0.26 | 24 | 1050 | 8  | 312.20    | 316.0 |
| 248 | 41Cr4 | 0.44 | 0.22 | 0.80 | 1.04 | 0.04 | 0.26 | 24 | 1050 | 8  | 644.20    | 279.0 |
| 249 | 41Cr4 | 0.44 | 0.22 | 0.80 | 1.04 | 0.04 | 0.26 | 24 | 1050 | 8  | 6,610.40  | 229.0 |
| 250 | 41Cr4 | 0.44 | 0.22 | 0.80 | 1.04 | 0.04 | 0.26 | 24 | 1050 | 8  | 80,051.70 | 230.0 |
| 251 | 41Cr4 | 0.41 | 0.25 | 0.71 | 1.06 | 0.02 | 0.22 | 21 | 840  | 8  | 6.10      | 735.0 |
| 252 | 41Cr4 | 0.41 | 0.25 | 0.71 | 1.06 | 0.02 | 0.22 | 21 | 840  | 8  | 11.40     | 669.0 |
| 253 | 41Cr4 | 0.41 | 0.25 | 0.71 | 1.06 | 0.02 | 0.22 | 21 | 840  | 8  | 21.20     | 608.0 |
| 254 | 41Cr4 | 0.41 | 0.25 | 0.71 | 1.06 | 0.02 | 0.22 | 21 | 840  | 8  | 48.50     | 363.0 |
| 255 | 41Cr4 | 0.41 | 0.25 | 0.71 | 1.06 | 0.02 | 0.22 | 21 | 840  | 8  | 69.60     | 350.0 |
| 256 | 41Cr4 | 0.41 | 0.25 | 0.71 | 1.06 | 0.02 | 0.22 | 21 | 840  | 8  | 136.40    | 327.0 |
| 257 | 41Cr4 | 0.41 | 0.25 | 0.71 | 1.06 | 0.02 | 0.22 | 21 | 840  | 8  | 217.30    | 279.0 |
| 258 | 41Cr4 | 0.41 | 0.25 | 0.71 | 1.06 | 0.02 | 0.22 | 21 | 840  | 8  | 312.20    | 235.0 |
| 259 | 41Cr4 | 0.41 | 0.25 | 0.71 | 1.06 | 0.02 | 0.22 | 21 | 840  | 8  | 1,138.10  | 230.0 |
| 260 | 36Cr6 | 0.36 | 0.25 | 0.49 | 1.54 | 0.03 | 0.21 | 24 | 860  | 10 | 9.50      | 735.0 |
| 261 | 36Cr6 | 0.36 | 0.25 | 0.49 | 1.54 | 0.03 | 0.21 | 24 | 860  | 10 | 15.50     | 627.0 |
| 262 | 36Cr6 | 0.36 | 0.25 | 0.49 | 1.54 | 0.03 | 0.21 | 24 | 860  | 10 | 43.70     | 454.0 |
| 263 | 36Cr6 | 0.36 | 0.25 | 0.49 | 1.54 | 0.03 | 0.21 | 24 | 860  | 10 | 136.40    | 375.0 |
| 264 | 36Cr6 | 0.36 | 0.25 | 0.49 | 1.54 | 0.03 | 0.21 | 24 | 860  | 10 | 312.20    | 327.0 |
| 265 | 36Cr6 | 0.36 | 0.25 | 0.49 | 1.54 | 0.03 | 0.21 | 24 | 860  | 10 | 678.40    | 223.0 |
| 266 | 36Cr6 | 0.36 | 0.25 | 0.49 | 1.54 | 0.03 | 0.21 | 24 | 860  | 10 | 2,742.90  | 220.0 |
| 267 | 36Cr6 | 0.36 | 0.25 | 0.49 | 1.54 | 0.03 | 0.21 | 24 | 860  | 10 | 75,232.30 | 170.0 |
| 268 | 36Cr6 | 0.36 | 0.25 | 0.49 | 1.54 | 0.03 | 0.21 | 26 | 1050 | 10 | 15.50     | 669.0 |
| 269 | 36Cr6 | 0.36 | 0.25 | 0.49 | 1.54 | 0.03 | 0.21 | 26 | 1050 | 10 | 43.70     | 382.0 |
| 270 | 36Cr6 | 0.36 | 0.25 | 0.49 | 1.54 | 0.03 | 0.21 | 26 | 1050 | 10 | 136.40    | 287.0 |
| 271 | 36Cr6 | 0.36 | 0.25 | 0.49 | 1.54 | 0.03 | 0.21 | 26 | 1050 | 10 | 346.20    | 279.0 |

|     |         |      |      |      |      |      |      |    |      |    |           |       |
|-----|---------|------|------|------|------|------|------|----|------|----|-----------|-------|
| 272 | 36Cr6   | 0.36 | 0.25 | 0.49 | 1.54 | 0.03 | 0.21 | 26 | 1050 | 10 | 678.40    | 270.0 |
| 273 | 36Cr6   | 0.36 | 0.25 | 0.49 | 1.54 | 0.03 | 0.21 | 26 | 1050 | 10 | 1,138.10  | 241.0 |
| 274 | 36Cr6   | 0.36 | 0.25 | 0.49 | 1.54 | 0.03 | 0.21 | 26 | 1050 | 10 | 5,960.50  | 230.0 |
| 275 | 36Cr6   | 0.36 | 0.25 | 0.49 | 1.54 | 0.03 | 0.21 | 26 | 1050 | 10 | 75,232.30 | 175.0 |
| 276 | 25CrMo4 | 0.22 | 0.25 | 0.64 | 0.97 | 0.23 | 0.33 | 14 | 875  | 10 | 3.50      | 520.0 |
| 277 | 25CrMo4 | 0.22 | 0.25 | 0.64 | 0.97 | 0.23 | 0.33 | 14 | 875  | 10 | 7.90      | 473.0 |
| 278 | 25CrMo4 | 0.22 | 0.25 | 0.64 | 0.97 | 0.23 | 0.33 | 14 | 875  | 10 | 14.00     | 389.0 |
| 279 | 25CrMo4 | 0.22 | 0.25 | 0.64 | 0.97 | 0.23 | 0.33 | 14 | 875  | 10 | 46.00     | 279.0 |
| 280 | 25CrMo4 | 0.22 | 0.25 | 0.64 | 0.97 | 0.23 | 0.33 | 14 | 875  | 10 | 66.10     | 267.0 |
| 281 | 25CrMo4 | 0.22 | 0.25 | 0.64 | 0.97 | 0.23 | 0.33 | 14 | 875  | 10 | 123.00    | 256.0 |
| 282 | 25CrMo4 | 0.22 | 0.25 | 0.64 | 0.97 | 0.23 | 0.33 | 14 | 875  | 10 | 346.20    | 223.0 |
| 283 | 25CrMo4 | 0.22 | 0.25 | 0.64 | 0.97 | 0.23 | 0.33 | 14 | 875  | 10 | 800.50    | 200.0 |
| 284 | 25CrMo4 | 0.22 | 0.25 | 0.64 | 0.97 | 0.23 | 0.33 | 14 | 875  | 10 | 1,198.50  | 200.0 |
| 285 | 25CrMo4 | 0.22 | 0.25 | 0.64 | 0.97 | 0.23 | 0.33 | 14 | 875  | 10 | 2,348.50  | 200.0 |
| 286 | 25CrMo4 | 0.22 | 0.25 | 0.64 | 0.97 | 0.23 | 0.33 | 14 | 875  | 10 | 8,562.20  | 200.0 |
| 287 | 25CrMo4 | 0.22 | 0.25 | 0.64 | 0.97 | 0.23 | 0.33 | 14 | 875  | 10 | 80,051.70 | 200.0 |
| 288 | 25CrMo4 | 0.22 | 0.25 | 0.64 | 0.97 | 0.23 | 0.33 | 17 | 1050 | 10 | 1.50      | 473.0 |
| 289 | 25CrMo4 | 0.22 | 0.25 | 0.64 | 0.97 | 0.23 | 0.33 | 17 | 1050 | 10 | 3.30      | 454.0 |
| 290 | 25CrMo4 | 0.22 | 0.25 | 0.64 | 0.97 | 0.23 | 0.33 | 17 | 1050 | 10 | 14.70     | 420.0 |
| 291 | 25CrMo4 | 0.22 | 0.25 | 0.64 | 0.97 | 0.23 | 0.33 | 17 | 1050 | 10 | 105.30    | 270.0 |
| 292 | 25CrMo4 | 0.22 | 0.25 | 0.64 | 0.97 | 0.23 | 0.33 | 17 | 1050 | 10 | 383.90    | 263.0 |
| 293 | 25CrMo4 | 0.22 | 0.25 | 0.64 | 0.97 | 0.23 | 0.33 | 17 | 1050 | 10 | 792.30    | 200.0 |
| 294 | 25CrMo4 | 0.22 | 0.25 | 0.64 | 0.97 | 0.23 | 0.33 | 17 | 1050 | 10 | 1,262.20  | 229.0 |
| 295 | 25CrMo4 | 0.22 | 0.25 | 0.64 | 0.97 | 0.23 | 0.33 | 17 | 1050 | 10 | 2,473.20  | 223.0 |
| 296 | 25CrMo4 | 0.22 | 0.25 | 0.64 | 0.97 | 0.23 | 0.33 | 17 | 1050 | 10 | 4,461.10  | 200.0 |
| 297 | 25CrMo4 | 0.22 | 0.25 | 0.64 | 0.97 | 0.23 | 0.33 | 17 | 1050 | 10 | 9,016.90  | 200.0 |
| 298 | 25CrMo4 | 0.22 | 0.25 | 0.64 | 0.97 | 0.23 | 0.33 | 17 | 1050 | 10 | 71,438.50 | 180.0 |
| 299 | 34CrMo4 | 0.30 | 0.22 | 0.64 | 1.01 | 0.24 | 0.11 | 16 | 850  | 10 | 3.10      | 645.0 |
| 300 | 34CrMo4 | 0.30 | 0.22 | 0.64 | 1.01 | 0.24 | 0.11 | 16 | 850  | 10 | 13.30     | 363.0 |
| 301 | 34CrMo4 | 0.30 | 0.22 | 0.64 | 1.01 | 0.24 | 0.11 | 16 | 850  | 10 | 43.70     | 327.0 |
| 302 | 34CrMo4 | 0.30 | 0.22 | 0.64 | 1.01 | 0.24 | 0.11 | 16 | 850  | 10 | 77.20     | 296.0 |
| 303 | 34CrMo4 | 0.30 | 0.22 | 0.64 | 1.01 | 0.24 | 0.11 | 16 | 850  | 10 | 136.40    | 270.0 |
| 304 | 34CrMo4 | 0.30 | 0.22 | 0.64 | 1.01 | 0.24 | 0.11 | 16 | 850  | 10 | 328.70    | 256.0 |
| 305 | 34CrMo4 | 0.30 | 0.22 | 0.64 | 1.01 | 0.24 | 0.11 | 16 | 850  | 10 | 714.40    | 263.0 |
| 306 | 34CrMo4 | 0.30 | 0.22 | 0.64 | 1.01 | 0.24 | 0.11 | 16 | 850  | 10 | 1,138.10  | 223.0 |
| 307 | 34CrMo4 | 0.30 | 0.22 | 0.64 | 1.01 | 0.24 | 0.11 | 16 | 850  | 10 | 8,130.40  | 200.0 |
| 308 | 34CrMo4 | 0.30 | 0.22 | 0.64 | 1.01 | 0.24 | 0.11 | 16 | 850  | 10 | 75,232.30 | 180.0 |
| 309 | 34CrMo4 | 0.30 | 0.22 | 0.64 | 1.01 | 0.24 | 0.11 | 20 | 1050 | 10 | 3.00      | 645.0 |
| 310 | 34CrMo4 | 0.30 | 0.22 | 0.64 | 1.01 | 0.24 | 0.11 | 20 | 1050 | 10 | 8.30      | 561.0 |
| 311 | 34CrMo4 | 0.30 | 0.22 | 0.64 | 1.01 | 0.24 | 0.11 | 20 | 1050 | 10 | 39.40     | 316.0 |
| 312 | 34CrMo4 | 0.30 | 0.22 | 0.64 | 1.01 | 0.24 | 0.11 | 20 | 1050 | 10 | 85.60     | 296.0 |
| 313 | 34CrMo4 | 0.30 | 0.22 | 0.64 | 1.01 | 0.24 | 0.11 | 20 | 1050 | 10 | 186.10    | 267.0 |
| 314 | 34CrMo4 | 0.30 | 0.22 | 0.64 | 1.01 | 0.24 | 0.11 | 20 | 1050 | 10 | 346.20    | 267.0 |
| 315 | 34CrMo4 | 0.30 | 0.22 | 0.64 | 1.01 | 0.24 | 0.11 | 20 | 1050 | 10 | 714.40    | 263.0 |
| 316 | 34CrMo4 | 0.30 | 0.22 | 0.64 | 1.01 | 0.24 | 0.11 | 20 | 1050 | 10 | 2,230.10  | 248.0 |
| 317 | 34CrMo4 | 0.30 | 0.22 | 0.64 | 1.01 | 0.24 | 0.11 | 20 | 1050 | 10 | 6,961.40  | 200.0 |
| 318 | 34CrMo4 | 0.30 | 0.22 | 0.64 | 1.01 | 0.24 | 0.11 | 20 | 1050 | 10 | 71,438.50 | 180.0 |
| 319 | 42CrMo4 | 0.38 | 0.23 | 0.64 | 0.99 | 0.16 | 0.08 | 18 | 850  | 10 | 3.10      | 735.0 |
| 320 | 42CrMo4 | 0.38 | 0.23 | 0.64 | 0.99 | 0.16 | 0.08 | 18 | 850  | 10 | 6.00      | 608.0 |
| 321 | 42CrMo4 | 0.38 | 0.23 | 0.64 | 0.99 | 0.16 | 0.08 | 18 | 850  | 10 | 14.00     | 575.0 |
| 322 | 42CrMo4 | 0.38 | 0.23 | 0.64 | 0.99 | 0.16 | 0.08 | 18 | 850  | 10 | 43.70     | 327.0 |
| 323 | 42CrMo4 | 0.38 | 0.23 | 0.64 | 0.99 | 0.16 | 0.08 | 18 | 850  | 10 | 206.40    | 270.0 |
| 324 | 42CrMo4 | 0.38 | 0.23 | 0.64 | 0.99 | 0.16 | 0.08 | 18 | 850  | 10 | 328.70    | 267.0 |
| 325 | 42CrMo4 | 0.38 | 0.23 | 0.64 | 0.99 | 0.16 | 0.08 | 18 | 850  | 10 | 974.50    | 230.0 |
| 326 | 42CrMo4 | 0.38 | 0.23 | 0.64 | 0.99 | 0.16 | 0.08 | 18 | 850  | 10 | 6,961.40  | 220.0 |

|     |          |      |      |      |      |      |      |    |      |    |           |       |
|-----|----------|------|------|------|------|------|------|----|------|----|-----------|-------|
| 327 | 42CrMo4  | 0.38 | 0.23 | 0.64 | 0.99 | 0.16 | 0.08 | 18 | 850  | 10 | 67,836.10 | 200.0 |
| 328 | 42CrMo4  | 0.38 | 0.23 | 0.64 | 0.99 | 0.16 | 0.08 | 16 | 1050 | 10 | 3.00      | 735.0 |
| 329 | 42CrMo4  | 0.38 | 0.23 | 0.64 | 0.99 | 0.16 | 0.08 | 16 | 1050 | 10 | 8.80      | 627.0 |
| 330 | 42CrMo4  | 0.38 | 0.23 | 0.64 | 0.99 | 0.16 | 0.08 | 16 | 1050 | 10 | 51.00     | 279.0 |
| 331 | 42CrMo4  | 0.38 | 0.23 | 0.64 | 0.99 | 0.16 | 0.08 | 16 | 1050 | 10 | 98.00     | 267.0 |
| 332 | 42CrMo4  | 0.38 | 0.23 | 0.64 | 0.99 | 0.16 | 0.08 | 16 | 1050 | 10 | 296.40    | 267.0 |
| 333 | 42CrMo4  | 0.38 | 0.23 | 0.64 | 0.99 | 0.16 | 0.08 | 16 | 1050 | 10 | 611.70    | 263.0 |
| 334 | 42CrMo4  | 0.38 | 0.23 | 0.64 | 0.99 | 0.16 | 0.08 | 16 | 1050 | 10 | 2,010.80  | 235.0 |
| 335 | 42CrMo4  | 0.38 | 0.23 | 0.64 | 0.99 | 0.16 | 0.08 | 16 | 1050 | 10 | 6,961.40  | 245.0 |
| 336 | 50CrMo4  | 0.50 | 0.32 | 0.80 | 1.04 | 0.24 | 0.11 | 63 | 1050 | 10 | 12.00     | 763.0 |
| 337 | 50CrMo4  | 0.50 | 0.32 | 0.80 | 1.04 | 0.24 | 0.11 | 63 | 1050 | 10 | 37.40     | 735.0 |
| 338 | 50CrMo4  | 0.50 | 0.32 | 0.80 | 1.04 | 0.24 | 0.11 | 63 | 1050 | 10 | 110.90    | 692.0 |
| 339 | 50CrMo4  | 0.50 | 0.32 | 0.80 | 1.04 | 0.24 | 0.11 | 63 | 1050 | 10 | 200.00    | 437.0 |
| 340 | 50CrMo4  | 0.50 | 0.32 | 0.80 | 1.04 | 0.24 | 0.11 | 63 | 1050 | 10 | 267.30    | 382.0 |
| 341 | 50CrMo4  | 0.50 | 0.32 | 0.80 | 1.04 | 0.24 | 0.11 | 63 | 1050 | 10 | 1,005.20  | 339.0 |
| 342 | 50CrMo4  | 0.50 | 0.32 | 0.80 | 1.04 | 0.24 | 0.11 | 63 | 1050 | 10 | 2,010.80  | 339.0 |
| 343 | 50CrMo4  | 0.50 | 0.32 | 0.80 | 1.04 | 0.24 | 0.11 | 63 | 1050 | 10 | 6,610.40  | 296.0 |
| 344 | 50CrMo4  | 0.50 | 0.32 | 0.80 | 1.04 | 0.24 | 0.11 | 63 | 1050 | 10 | 61,167.00 | 250.0 |
| 345 | 50CrMo4  | 0.46 | 0.22 | 0.50 | 1.00 | 0.21 | 0.22 | 41 | 850  | 10 | 11.70     | 790.0 |
| 346 | 50CrMo4  | 0.46 | 0.22 | 0.50 | 1.00 | 0.21 | 0.22 | 41 | 850  | 10 | 35.50     | 763.0 |
| 347 | 50CrMo4  | 0.46 | 0.22 | 0.50 | 1.00 | 0.21 | 0.22 | 41 | 850  | 10 | 60.90     | 608.0 |
| 348 | 50CrMo4  | 0.46 | 0.22 | 0.50 | 1.00 | 0.21 | 0.22 | 41 | 850  | 10 | 110.90    | 429.0 |
| 349 | 50CrMo4  | 0.46 | 0.22 | 0.50 | 1.00 | 0.21 | 0.22 | 41 | 850  | 10 | 281.50    | 350.0 |
| 350 | 50CrMo4  | 0.46 | 0.22 | 0.50 | 1.00 | 0.21 | 0.22 | 41 | 850  | 10 | 624.50    | 350.0 |
| 351 | 50CrMo4  | 0.46 | 0.22 | 0.50 | 1.00 | 0.21 | 0.22 | 41 | 850  | 10 | 1,080.70  | 327.0 |
| 352 | 50CrMo4  | 0.46 | 0.22 | 0.50 | 1.00 | 0.21 | 0.22 | 41 | 850  | 10 | 2,010.80  | 327.0 |
| 353 | 50CrMo4  | 0.46 | 0.22 | 0.50 | 1.00 | 0.21 | 0.22 | 41 | 850  | 10 | 7,881.90  | 250.0 |
| 354 | 50CrMo4  | 0.46 | 0.22 | 0.50 | 1.00 | 0.21 | 0.22 | 44 | 1050 | 10 | 4.30      | 818.0 |
| 355 | 50CrMo4  | 0.46 | 0.22 | 0.50 | 1.00 | 0.21 | 0.22 | 44 | 1050 | 10 | 12.60     | 818.0 |
| 356 | 50CrMo4  | 0.46 | 0.22 | 0.50 | 1.00 | 0.21 | 0.22 | 44 | 1050 | 10 | 35.50     | 790.0 |
| 357 | 50CrMo4  | 0.46 | 0.22 | 0.50 | 1.00 | 0.21 | 0.22 | 44 | 1050 | 10 | 57.80     | 645.0 |
| 358 | 50CrMo4  | 0.46 | 0.22 | 0.50 | 1.00 | 0.21 | 0.22 | 44 | 1050 | 10 | 116.80    | 420.0 |
| 359 | 50CrMo4  | 0.46 | 0.22 | 0.50 | 1.00 | 0.21 | 0.22 | 44 | 1050 | 10 | 296.40    | 363.0 |
| 360 | 50CrMo4  | 0.46 | 0.22 | 0.50 | 1.00 | 0.21 | 0.22 | 44 | 1050 | 10 | 1,080.70  | 327.0 |
| 361 | 50CrMo4  | 0.46 | 0.22 | 0.50 | 1.00 | 0.21 | 0.22 | 44 | 1050 | 10 | 2,010.80  | 305.0 |
| 362 | 50CrMo4  | 0.46 | 0.22 | 0.50 | 1.00 | 0.21 | 0.22 | 44 | 1050 | 10 | 7,331.10  | 263.0 |
| 363 | 27MnCrV4 | 0.24 | 0.21 | 1.06 | 0.79 | 0.02 | 0.18 | 14 | 880  | 10 | 2.00      | 520.0 |
| 364 | 27MnCrV4 | 0.24 | 0.21 | 1.06 | 0.79 | 0.02 | 0.18 | 14 | 880  | 10 | 2.70      | 508.0 |
| 365 | 27MnCrV4 | 0.24 | 0.21 | 1.06 | 0.79 | 0.02 | 0.18 | 14 | 880  | 10 | 6.70      | 429.0 |
| 366 | 27MnCrV4 | 0.24 | 0.21 | 1.06 | 0.79 | 0.02 | 0.18 | 14 | 880  | 10 | 11.20     | 382.0 |
| 367 | 27MnCrV4 | 0.24 | 0.21 | 1.06 | 0.79 | 0.02 | 0.18 | 14 | 880  | 10 | 16.00     | 316.0 |
| 368 | 27MnCrV4 | 0.24 | 0.21 | 1.06 | 0.79 | 0.02 | 0.18 | 14 | 880  | 10 | 52.30     | 296.0 |
| 369 | 27MnCrV4 | 0.24 | 0.21 | 1.06 | 0.79 | 0.02 | 0.18 | 14 | 880  | 10 | 83.10     | 241.0 |
| 370 | 27MnCrV4 | 0.24 | 0.21 | 1.06 | 0.79 | 0.02 | 0.18 | 14 | 880  | 10 | 150.90    | 250.0 |
| 371 | 27MnCrV4 | 0.24 | 0.21 | 1.06 | 0.79 | 0.02 | 0.18 | 14 | 880  | 10 | 244.60    | 240.0 |
| 372 | 27MnCrV4 | 0.24 | 0.21 | 1.06 | 0.79 | 0.02 | 0.18 | 14 | 880  | 10 | 719.70    | 210.0 |
| 373 | 27MnCrV4 | 0.24 | 0.21 | 1.06 | 0.79 | 0.02 | 0.18 | 14 | 880  | 10 | 7,271.20  | 180.0 |
| 374 | 27MnCrV4 | 0.24 | 0.21 | 1.06 | 0.79 | 0.02 | 0.18 | 17 | 1050 | 10 | 2.10      | 508.0 |
| 375 | 27MnCrV4 | 0.24 | 0.21 | 1.06 | 0.79 | 0.02 | 0.18 | 17 | 1050 | 10 | 4.20      | 508.0 |
| 376 | 27MnCrV4 | 0.24 | 0.21 | 1.06 | 0.79 | 0.02 | 0.18 | 17 | 1050 | 10 | 9.60      | 454.0 |
| 377 | 27MnCrV4 | 0.24 | 0.21 | 1.06 | 0.79 | 0.02 | 0.18 | 17 | 1050 | 10 | 14.50     | 382.0 |
| 378 | 27MnCrV4 | 0.24 | 0.21 | 1.06 | 0.79 | 0.02 | 0.18 | 17 | 1050 | 10 | 55.10     | 270.0 |
| 379 | 27MnCrV4 | 0.24 | 0.21 | 1.06 | 0.79 | 0.02 | 0.18 | 17 | 1050 | 10 | 102.10    | 267.0 |
| 380 | 27MnCrV4 | 0.24 | 0.21 | 1.06 | 0.79 | 0.02 | 0.18 | 17 | 1050 | 10 | 154.00    | 267.0 |
| 381 | 27MnCrV4 | 0.24 | 0.21 | 1.06 | 0.79 | 0.02 | 0.18 | 17 | 1050 | 10 | 332.90    | 256.0 |

|     |          |      |      |      |      |      |      |    |      |    |           |       |
|-----|----------|------|------|------|------|------|------|----|------|----|-----------|-------|
| 382 | 27MnCrV4 | 0.24 | 0.21 | 1.06 | 0.79 | 0.02 | 0.18 | 17 | 1050 | 10 | 757.60    | 223.0 |
| 383 | 27MnCrV4 | 0.24 | 0.21 | 1.06 | 0.79 | 0.02 | 0.18 | 17 | 1050 | 10 | 7,271.20  | 195.0 |
| 384 | 27MnCrV4 | 0.24 | 0.21 | 1.06 | 0.79 | 0.02 | 0.18 | 17 | 1050 | 10 | 43,939.70 | 165.0 |
| 385 | 50CrV4   | 0.55 | 0.22 | 0.98 | 1.02 | 0.00 | 0.01 | 25 | 880  | 5  | 12.60     | 888.0 |
| 386 | 50CrV4   | 0.55 | 0.22 | 0.98 | 1.02 | 0.00 | 0.01 | 25 | 880  | 5  | 21.20     | 845.0 |
| 387 | 50CrV4   | 0.55 | 0.22 | 0.98 | 1.02 | 0.00 | 0.01 | 25 | 880  | 5  | 35.50     | 790.0 |
| 388 | 50CrV4   | 0.55 | 0.22 | 0.98 | 1.02 | 0.00 | 0.01 | 25 | 880  | 5  | 56.60     | 520.0 |
| 389 | 50CrV4   | 0.55 | 0.22 | 0.98 | 1.02 | 0.00 | 0.01 | 25 | 880  | 5  | 77.20     | 404.0 |
| 390 | 50CrV4   | 0.55 | 0.22 | 0.98 | 1.02 | 0.00 | 0.01 | 25 | 880  | 5  | 116.80    | 429.0 |
| 391 | 50CrV4   | 0.55 | 0.22 | 0.98 | 1.02 | 0.00 | 0.01 | 25 | 880  | 5  | 241.00    | 305.0 |
| 392 | 50CrV4   | 0.55 | 0.22 | 0.98 | 1.02 | 0.00 | 0.01 | 25 | 880  | 5  | 974.50    | 267.0 |
| 393 | 50CrV4   | 0.55 | 0.22 | 0.98 | 1.02 | 0.00 | 0.01 | 25 | 880  | 5  | 6,961.40  | 241.0 |
| 394 | 50CrV4   | 0.55 | 0.22 | 0.98 | 1.02 | 0.00 | 0.01 | 25 | 880  | 5  | 67,836.10 | 230.0 |
| 395 | 50CrV4   | 0.55 | 0.22 | 0.98 | 1.02 | 0.00 | 0.01 | 43 | 1050 | 5  | 10.30     | 888.0 |
| 396 | 50CrV4   | 0.55 | 0.22 | 0.98 | 1.02 | 0.00 | 0.01 | 43 | 1050 | 5  | 19.10     | 845.0 |
| 397 | 50CrV4   | 0.55 | 0.22 | 0.98 | 1.02 | 0.00 | 0.01 | 43 | 1050 | 5  | 32.00     | 845.0 |
| 398 | 50CrV4   | 0.55 | 0.22 | 0.98 | 1.02 | 0.00 | 0.01 | 43 | 1050 | 5  | 73.30     | 645.0 |
| 399 | 50CrV4   | 0.55 | 0.22 | 0.98 | 1.02 | 0.00 | 0.01 | 43 | 1050 | 5  | 143.60    | 389.0 |
| 400 | 50CrV4   | 0.55 | 0.22 | 0.98 | 1.02 | 0.00 | 0.01 | 43 | 1050 | 5  | 312.20    | 382.0 |
| 401 | 50CrV4   | 0.55 | 0.22 | 0.98 | 1.02 | 0.00 | 0.01 | 43 | 1050 | 5  | 1,080.70  | 350.0 |
| 402 | 50CrV4   | 0.55 | 0.22 | 0.98 | 1.02 | 0.00 | 0.01 | 43 | 1050 | 5  | 6,961.40  | 279.0 |
| 403 | 50CrV4   | 0.55 | 0.22 | 0.98 | 1.02 | 0.00 | 0.01 | 43 | 1050 | 5  | 67,836.10 | 223.0 |
| 404 | 50CrV4   | 0.47 | 0.35 | 0.82 | 1.20 | 0.00 | 0.04 | 60 | 880  | 5  | 8.00      | 735.0 |
| 405 | 50CrV4   | 0.47 | 0.35 | 0.82 | 1.20 | 0.00 | 0.04 | 60 | 880  | 5  | 20.50     | 692.0 |
| 406 | 50CrV4   | 0.47 | 0.35 | 0.82 | 1.20 | 0.00 | 0.04 | 60 | 880  | 5  | 32.00     | 692.0 |
| 407 | 50CrV4   | 0.47 | 0.35 | 0.82 | 1.20 | 0.00 | 0.04 | 60 | 880  | 5  | 60.20     | 575.0 |
| 408 | 50CrV4   | 0.47 | 0.35 | 0.82 | 1.20 | 0.00 | 0.04 | 60 | 880  | 5  | 81.30     | 473.0 |
| 409 | 50CrV4   | 0.47 | 0.35 | 0.82 | 1.20 | 0.00 | 0.04 | 60 | 880  | 5  | 123.00    | 437.0 |
| 410 | 50CrV4   | 0.47 | 0.35 | 0.82 | 1.20 | 0.00 | 0.04 | 60 | 880  | 5  | 228.80    | 316.0 |
| 411 | 50CrV4   | 0.47 | 0.35 | 0.82 | 1.20 | 0.00 | 0.04 | 60 | 880  | 5  | 906.40    | 256.0 |
| 412 | 50CrV4   | 0.47 | 0.35 | 0.82 | 1.20 | 0.00 | 0.04 | 60 | 880  | 5  | 9,016.90  | 223.0 |
| 413 | 50CrV4   | 0.47 | 0.35 | 0.82 | 1.20 | 0.00 | 0.04 | 60 | 880  | 5  | 71,438.50 | 230.0 |
| 414 | 50CrV4   | 0.47 | 0.35 | 0.82 | 1.20 | 0.00 | 0.04 | 26 | 1050 | 5  | 8.60      | 735.0 |
| 415 | 50CrV4   | 0.47 | 0.35 | 0.82 | 1.20 | 0.00 | 0.04 | 26 | 1050 | 5  | 13.30     | 692.0 |
| 416 | 50CrV4   | 0.47 | 0.35 | 0.82 | 1.20 | 0.00 | 0.04 | 26 | 1050 | 5  | 37.40     | 692.0 |
| 417 | 50CrV4   | 0.47 | 0.35 | 0.82 | 1.20 | 0.00 | 0.04 | 26 | 1050 | 5  | 53.70     | 608.0 |
| 418 | 50CrV4   | 0.47 | 0.35 | 0.82 | 1.20 | 0.00 | 0.04 | 26 | 1050 | 5  | 123.00    | 508.0 |
| 419 | 50CrV4   | 0.47 | 0.35 | 0.82 | 1.20 | 0.00 | 0.04 | 26 | 1050 | 5  | 312.20    | 404.0 |
| 420 | 50CrV4   | 0.47 | 0.35 | 0.82 | 1.20 | 0.00 | 0.04 | 26 | 1050 | 5  | 425.80    | 420.0 |
| 421 | 50CrV4   | 0.47 | 0.35 | 0.82 | 1.20 | 0.00 | 0.04 | 26 | 1050 | 5  | 974.50    | 339.0 |
| 422 | 50CrV4   | 0.47 | 0.35 | 0.82 | 1.20 | 0.00 | 0.04 | 26 | 1050 | 5  | 7,881.90  | 263.0 |
| 423 | 50CrV4   | 0.47 | 0.35 | 0.82 | 1.20 | 0.00 | 0.04 | 26 | 1050 | 5  | 75,232.30 | 240.0 |
